# Multifaceted Brain Age Measures Reveal Premature Brain Aging and Associations with Clinical Manifestations in Schizophrenia

Chang-Le Chen<sup>a1</sup>, Tzung-Jeng Hwang<sup>b1</sup>, Yu-Hung Tung<sup>c</sup>, Li-Ying Yang<sup>a</sup>, Yung-Chin Hsu<sup>d</sup>, Chih-Min Liu<sup>b</sup>, Hai-Gwo Hwu<sup>b</sup>, Yi-Tin Lin<sup>b</sup>, Ming-Hsien Hsieh<sup>b</sup>, Chen-Chung Liu<sup>b</sup>, Yi-Ling Chien<sup>b</sup>, Wen-Yih Isaac Tseng<sup>a,e,f,\*</sup>

<sup>a</sup> Institute of Medical Device and Imaging, College of Medicine, National Taiwan University, Taipei, Taiwan;

<sup>b</sup> Department of Psychiatry, National Taiwan University Hospital, Taipei, Taiwan;

<sup>c</sup> Department of Medicine, College of Medicine, National Taiwan University, Taipei, Taiwan;

<sup>d</sup> AcroViz Technology Inc., Taipei, Taiwan;

<sup>e</sup> Graduate Institute of Brain and Mind Sciences, College of Medicine, National Taiwan University, Taipei, Taiwan;

<sup>f</sup> Molecular Imaging Center, National Taiwan University, Taipei, Taiwan

<sup>1</sup> These authors contributed equally

\* Corresponding author. Institute of Medical Device and Imaging, National Taiwan University College of Medicine, No. 1, Sec. 1, Jen-Ai Road, Taipei 10051, Taiwan.

E-mail address: [wyseng@ntu.edu.tw](mailto:wyseng@ntu.edu.tw)

## Keywords:

Brain age; Schizophrenia; Premature brain aging; Magnetic resonance imaging; Multimodality; Normative model; Diffusion MRI; Machine learning

1 **Abstract:**

2 Schizophrenia is a mental disorder with extensive alterations of cerebral gray matter (GM) and  
3 white matter (WM) and is known to have advanced brain aging. However, how the structural  
4 alterations contribute to brain aging and how brain aging is related to clinical manifestations remain  
5 unclear. Here, we estimated the bias-free multifaceted brain age measures in patients with  
6 schizophrenia (N=147) using structural and diffusion magnetic resonance imaging data. We calculated  
7 feature importance to estimate regional contributions to advanced brain aging in schizophrenia.  
8 Furthermore, regression analyses were conducted to test the associations of brain age with illness  
9 duration, onset age, symptom severity, and intelligence quotient. The patients with schizophrenia  
10 manifested significantly old-appearing brain age ( $P<.001$ ) in both GM and WM compared with the  
11 healthy norm. The GM and WM structures contributing to the advanced brain aging were mostly  
12 located in the frontal and temporal lobes. Among the features, the GM volume and mean diffusivity  
13 of WM were most sensitive to the neuropathological changes in schizophrenia. The WM brain age  
14 index was associated with a negative symptom score ( $P=.006$ ), and the WM and multimodal brain age  
15 indices demonstrated negative associations with the intelligence quotient ( $P=.037$ ;  $P=.040$ ,  
16 respectively). Moreover, brain age exhibited associations with the onset age ( $P=.006$ ) but no  
17 associations with the illness duration, which may support the early-hit non-progression hypothesis. In  
18 conclusion, our study reveals the structural underpinnings of premature brain aging in schizophrenia  
19 and its clinical significance. The brain age measures might be a potentially informative biomarker for  
20 stratification and prognostication of patients with schizophrenia.

21

22

## 1 **1 Introduction**

2 A growing body of evidence has demonstrated that schizophrenia is a psychiatric disorder with  
3 neurobiological alterations involved in both neurodevelopmental and neurodegenerative processes<sup>1-3</sup>  
4 that manifest various impairments in brain structure and function<sup>4-6</sup>. Neuroimaging studies have  
5 reported pronounced gray matter (GM) volume loss throughout the brain<sup>7,8</sup> and reduction in cortical  
6 thickness primarily in the frontal and temporal areas<sup>9</sup>. These changes resemble the changes observed  
7 in the aging process<sup>10</sup>. Moreover, diffusion magnetic resonance imaging (MRI) constantly reported  
8 altered integrity of white matter (WM) in schizophrenia<sup>11</sup> which reflects the disconnection between  
9 cortical areas and may lead to cognitive impairments<sup>12</sup>. One study reported that WM integrity, as  
10 measured by fractional anisotropy, was reduced in younger patients with schizophrenia, and the  
11 reduction pattern was similar to that in older healthy controls<sup>13</sup>, suggesting a premature reduction of  
12 WM integrity in schizophrenia. These findings demonstrate an older biological status of the brain in  
13 patients and suggest premature brain aging in schizophrenia<sup>14,15</sup>.

14 A neuroimaging-based brain age paradigm has been developed as an imaging biomarker to  
15 investigate aberrant brain aging, which occurs in numerous neurological diseases and psychiatric  
16 disorders<sup>14,16-18</sup>. This approach enables precise and individualized quantification of the extent of brain  
17 aging. To estimate the brain age index, numerous brain scans are acquired from cognitively healthy  
18 individuals, and these brain scans are employed as a reference cohort to create and define a brain age  
19 prediction model. Through modern machine learning and deep learning techniques, brain scans can  
20 be transformed from high-dimensional neuroimaging features into a concise brain age marker by  
21 learning the complex aging pattern in biomedical images. Consequently, the established brain age  
22 prediction model can predict the brain age of other individuals. The predicted age difference (PAD),  
23 which is the difference between an individual's brain age and chronological age, quantitatively  
24 indicates deviation from the defined healthy aging trajectory<sup>19</sup>. Depending on the neuroimaging data  
25 modality, the derived PAD highlights different aspects of brain aging.

1 Brain age measures are capable of revealing the underlying mechanism of brain aging in  
2 schizophrenia. GM-based brain age measures have indicated apparent brain aging in patients with  
3 schizophrenia compared with healthy controls, for those in early stages and those with chronic  
4 illness<sup>14,20-22</sup>. Furthermore, several studies have indicated that the effect of apparent brain aging  
5 becomes more prominent over time, especially within the short-term period after disease onset,  
6 suggesting that accelerated brain aging occurs in patients with schizophrenia<sup>14,22</sup>. However, a study  
7 reported that patient's brain age did not progress for the remainder of life, implying that the aging  
8 induced by the disease was not accelerated<sup>23</sup>. The conflicting reports indicate that the hypothesis of  
9 accelerated brain aging in schizophrenia is controversial.

10 Although these pioneering studies demonstrated the applications of brain age paradigms in  
11 schizophrenia, several limitations remain. First, most brain age research has only adopted the single  
12 imaging modality, such as GM volumetric features, to estimate the PAD. Few studies have addressed  
13 the brain aging in schizophrenia with other imaging features such as WM integrity and multimodal  
14 features. Multidimensional investigations of brain structure alterations in patients with schizophrenia  
15 are still lacking. Moreover, regular PAD, which is the most common measure employed in brain age  
16 studies, has an intrinsic statistical bias when estimated during the model training phase; the PAD is  
17 significantly correlated with chronological age in the model training set<sup>24</sup>. This bias makes PAD  
18 dependent on chronological age. To our knowledge, no study of brain age in schizophrenia has directly  
19 addressed this problem. Furthermore, although machine-learning-based brain age predictions provide  
20 an advanced approach for quantitatively estimating the degree of brain aging, the characteristics of the  
21 unexplainable “black box” inside the machine learning algorithms hinder the interpretation of feature  
22 importance for neurobiological inference.

23 To investigate the multifaceted biological age in schizophrenia and address these limitations, we  
24 constructed three types of brain age models based on the neuroimaging features of the GM, WM, and  
25 their combination (i.e., multimodality). We then estimated the bias-free brain age indices of patients

1 with schizophrenia. We hypothesized that these brain age indices may reflect different aspects of the  
2 advanced brain aging in the patients with schizophrenia. Additionally, the clinical relevance of brain  
3 age indices in schizophrenia was investigated; we postulated that brain age indices may exhibit  
4 statistical associations with various clinical factors, such as illness duration, onset age, symptom  
5 severity, and general cognition (e.g., full-scale intelligence quotient, FSIQ). Moreover, we established  
6 a series of region-of-interest (ROI)-based normative models<sup>25</sup> by using healthy individuals to define  
7 the norm of imaging measures and then quantify the extent of structural impairments in schizophrenia  
8 against the healthy norm. This approach enables quantification of certain impaired brain regions in the  
9 patients with schizophrenia. We then evaluated multivariate correlation between the structural  
10 deviance of the patients with schizophrenia and their brain age indices, estimating the contribution of  
11 each structural feature. Using this framework, we aimed to delineate a brain network that explains the  
12 advanced brain aging in schizophrenia.

13

## 1 **2 Materials and Methods**

### 2 2.1 Participants

3 Patients with schizophrenia (N = 147; mean age = 31.1; standard deviation [SD] = 8.3; range 16–  
4 62; sex: 46.3% men) were consecutively recruited from the outpatient clinic of the Department of  
5 Psychiatry of National Taiwan University Hospital (NTUH) from 2010 to 2017. Patients recruited  
6 before 2014 were diagnosed of schizophrenia based on the Diagnostic and Statistical Manual of  
7 Mental Disorders-4 (DSM-4) criteria, and their symptoms and clinical presentations satisfied the  
8 DSM-5 criteria after rediagnosis. Patients recruited after 2014 were diagnosed using the DSM-5  
9 criteria. Diagnoses of schizophrenia were made after comprehensive chart review and personal  
10 interviews performed by experienced psychiatrists. Patients with schizoaffective disorder, bipolar  
11 disorder, substance abuse, intellectual disability, major systemic disease, or neurological diseases were  
12 excluded. The symptoms at initial recruitment were assessed by the senior psychiatrists from the  
13 Department of Psychiatry of the NTUH by using the Positive and Negative Syndrome Scale (PANSS),  
14 and the FSIQ were measured by using the Wechsler Adult Intelligence Scale—Third Edition<sup>26,27</sup>. All  
15 participants provided written informed consent, and the Institutional Review Board of NTUH  
16 approved the study.

17 Brain images of 482 cognitively normal individuals (mean age = 36.9, SD = 19.1, range = 14–  
18 92; sex: 53.1% women) obtained from the NTUH MRI database, including T1-weighted images and  
19 diffusion spectrum imaging (DSI) data sets, were used as the training set to develop brain age  
20 prediction models. Another independent set of 70 cognitively normal individuals (mean age = 36.8,  
21 SD = 19.9, range = 14–83; sex: 52.2% women) from the database was used to assess the reproducibility  
22 of the brain age models. All 552 cognitively normal participants had no history of neurologic or  
23 psychiatric illness. Detailed information on the recruitment criteria for cognitively normal individuals  
24 is provided in Supplementary Material S1.1. All training and test sets were anonymized.

25

## 1           2.2 MRI Image Acquisition

2           All brain images, including the training and test sets and those from patients with schizophrenia,  
3 were acquired using the same 3-Tesla MRI scanner (Tim Trio; Siemens, Erlangen, Germany) with a  
4 32-channel phased-array head coil. High-resolution T1-weighted imaging was performed using a  
5 three-dimensional (3D) magnetization-prepared rapid gradient-echo sequence with the isotropic  
6 spatial resolution in 1 mm<sup>3</sup>. DSI, which is designed to capture the microstructural integrity of WM,  
7 was performed using a pulsed-gradient spin-echo diffusion echo-planar imaging sequence with a  
8 twice-refocused balanced echo<sup>28</sup>; the imaging parameters were  $b_{\max} = 4000 \text{ s/mm}^2$  and in-plane spatial  
9 resolution =  $2.5 \times 2.5 \text{ mm}^2$ . The diffusion-encoding acquisition scheme followed the framework of  
10 DSI<sup>29</sup>, which comprised 102 diffusion-encoding gradients corresponding to the Cartesian grids in the  
11 half-sphere of the 3D diffusion-encoding space ( $q$ -space)<sup>30</sup>. Each MRI scan included T1-weighted  
12 imaging. DSI was completed within 20 minutes. Detailed information on the imaging parameters is  
13 provided in Supplementary Material S2.1.

14

## 15           2.3 Image Analysis

16           Before image data analysis was performed, all T1-weighted images and DSI data sets underwent  
17 quality assurance procedures, which are detailed in Supplementary Information S2.2. To extract GM  
18 features from the T1-weighted images, voxel-based morphometry and surface-based morphometry  
19 were performed using the Computational Anatomy Toolbox (CAT12)<sup>31</sup>, which is an extension of  
20 Statistical Parametric Mapping 12<sup>32</sup> (Figure 1A). Voxel-based morphometry was applied to estimate  
21 voxel-wise regional volume features according to the LONI probabilistic brain atlas, which contains  
22 56 ROIs<sup>33</sup>. Surface-based morphometry was employed to measure cortical thickness through  
23 projection-based thickness estimation<sup>34</sup>. The estimated thickness features were sampled according to  
24 the 68 cortical ROIs included in the Desikan–Killiany cortical atlas<sup>35</sup>. The detailed information of the  
25 image processing is provided in Supplementary Information S2.3. Briefly, a total of 56 volumetric

1 features and 68 cortical thickness features were obtained and used to estimate the GM-based brain age.

2 WM features were extracted from DSI data sets by using an in-house automatic analytic pipeline  
3 to transform DSI data into tract-specific features<sup>36</sup> (Figure 1A). The analytic algorithm is detailed in  
4 Supplementary Information S2.3. In brief, DSI data were reconstructed into structure-related diffusion  
5 indices (i.e., generalized fractional anisotropy [GFA] and mean diffusivity [MD]) by using the  
6 regularized version of the mean apparent propagator (MAP)-MRI algorithm<sup>37,38</sup>. A two-step  
7 registration process with an advanced diffusion MRI-specific registration algorithm<sup>39</sup> was employed  
8 to minimize the registration bias arising from cross-lifespan data variation. Finally, the predefined tract  
9 bundle coordinates on a standard template were projected according to the transformation map  
10 obtained from the registration process onto individuals' diffusion index maps to sample tract-specific  
11 features. The pipeline produced 45 tract features for each index from each participant. Consequently,  
12 45 GFA and 45 MD features were obtained to estimate the WM-based brain age. The parcellation of  
13 GM and WM ROIs is detailed in Supplementary eTable.



### A. Image processing for neuroimaging data

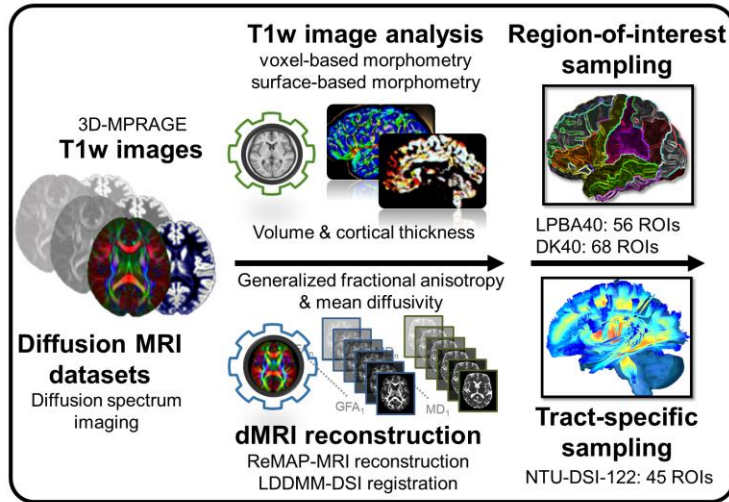

### B. Modeling normal brain aging

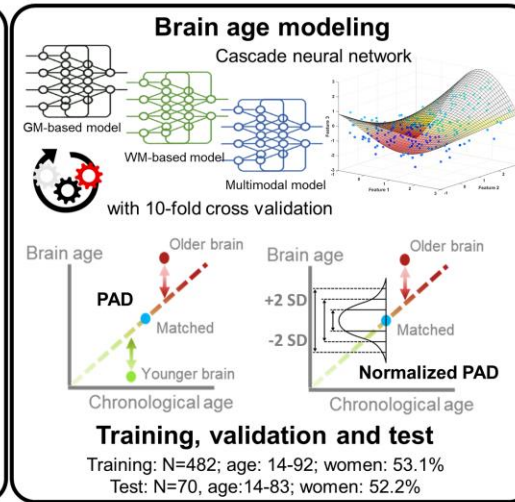

### C. Individual brain age estimation

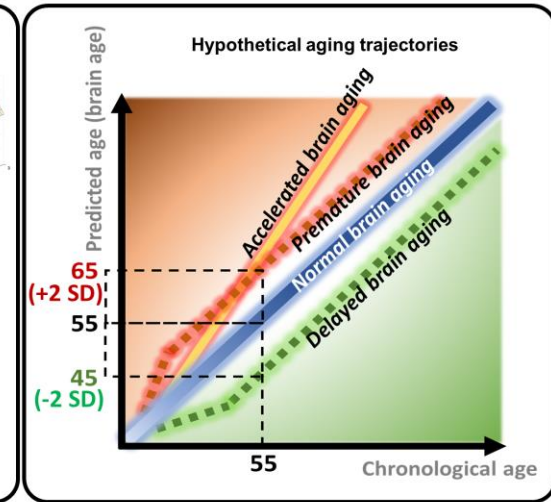

1

2 Figure 1. Analytic pipeline and conceptual explanation of brain age. Subplot A illustrates the imaging processing for the T1-weighted images and

3 diffusion spectrum imaging datasets. Subplot B represents the brain age models established using the data sampled from a normal population.

4 Subplot C demonstrates the hypothetical aging trajectories corresponding to the individual brain age inference.

5

## 1           2.4 Brain Age Modeling

2           The GM, WM, and multimodal brain age prediction models were established using the training  
3 set's neuroimaging features to predict brain age based on GM, WM, and both GM and WM features,  
4 respectively (Figure 1B). Sex was also included as a predictor. The architecture of the brain age model  
5 was designed to have a 12-layer feedforward cascade neural network<sup>40</sup>. A 10-fold cross-validation  
6 procedure was performed to estimate the performance of the brain age models in the training phase.  
7 An independent test set was then used to evaluate the reproducibility of the brain age models. The  
8 detailed description of brain age modeling and results of model performance are provided in  
9 Supplementary Information S1.2 and S3, respectively.

10           After model performance was determined, the correction models for minimizing age-related bias  
11 were constructed for each brain age model by using the training set. Age-related bias refers to the  
12 statistical bias of PAD (i.e. predicted age – chronological age, used to represent the degree of aging;  
13 Figure 1C), which was significantly correlated with chronological age in the training set<sup>24</sup>. In practice,  
14 Gaussian process regression (GPR)<sup>41</sup> was used to obtain regression model estimates for the training  
15 set; the independent variables were age and sex, and the dependent variable was the predicted age.  
16 The mean and SD of the training sample's predicted age for a certain age and sex were estimated from  
17 the GPR models, and a new individual's predicted age was standardized into a value resembling a Z-  
18 score on the basis of the derived mean and SD of predicted age of the individual's peers. The Z-score-  
19 like value was termed normalized PAD (nPAD). The nPAD value is free of age-related bias and has  
20 biological meaning similar to that of the original PAD, with higher values indicating an older brain.  
21 This normalization procedure is in accord with the notion of a normative model<sup>42</sup>. Under the  
22 normalization, the individual's predicted age is compared with the individual's peers' mean predicted  
23 age rather than the individual's chronological age.

24

## 25           2.5 Normative Modeling for Structural Features

1 ROI-based normative models were also established for each neuroimaging feature by using the  
2 training set. The purpose of normative models was to define a statistical norm for each structural  
3 feature based on a cognitively normal population-based cohort given certain age and sex<sup>42</sup>. This  
4 method enabled the quantification of an individual's structural deviance compared with the norm. This  
5 deviance, which was equivalent to a standardized score (Z-score), served as a measure of the structural  
6 integrity of brain regions. A normative model was built for each structural feature (i.e., each GM and  
7 WM feature) by using the training set to estimate the mean and SD of model functions with GPR  
8 approach. The independent variables were age and sex, and the dependent variable was the structural  
9 feature. After ROI-based normative modeling was performed, these normative models were applied  
10 to patients with schizophrenia to calculate the Z-score for each brain region. These estimated Z-scores  
11 were further used to calculate regional contributions to brain aging in patients with schizophrenia.

12

## 13 2.6 Statistical Analysis

14 Three analyses were performed in the study to test the hypotheses. The first analysis was the  
15 comparison of nPAD in schizophrenia with respect to cognitively normal individuals. The nPAD  
16 scores derived from GM, WM, and multimodal models were compared with the population mean of  
17 cognitively normal individuals, which should be zero, by using one-sample *t* tests. In addition, paired  
18 *t* tests and Pearson's correlation coefficients were respectively employed to examine the differences  
19 and correlation between GM and WM nPAD scores in patients with schizophrenia.

20 A multiple linear regression analysis was performed to assess the relationship between the nPAD  
21 scores (as dependent variables) and clinical manifestations (as independent variables). The clinical  
22 manifestations consisted of symptom scores (i.e., PANSS positive, negative, and general scores) and  
23 clinical factors (i.e., duration of illness, onset age, and antipsychotic dosage). The multiple comparison  
24 problem was addressed by Benjamini-Hochberg correction<sup>43</sup>. In addition, the relationship between  
25 brain age indices and general cognition in patients with schizophrenia was assessed by multiple

1 regression analysis associating the nPAD scores (as independent variables) with the FSIQ (as the  
2 dependent variable) in the patient group. Age, sex, and years of education were controlled.

3       The final analysis was to calculate feature importance and identify the regions that contributed  
4 most to advanced aging in schizophrenia. The analysis consisted of two steps. First, we calculated  
5 patients' Z-score profiles of structural features using ROI-based normative models. Z-score values  
6 indicate the magnitude of structural impairment deviated from the normal means. Second, we tested  
7 the correlations between patients' Z-score values and their nPAD scores using canonical correlation  
8 analysis (CCA)<sup>44</sup>. The coefficients of the brain regions in CCA were normalized into 0 to 1. The  
9 normalized coefficients represented the weights of the contribution to the nPAD scores, thus reflecting  
10 the feature importance of advanced aging in individuals with schizophrenia.

## 1 **3 Results**

### 2 3.1 Comparisons of normalized predicted age difference (nPAD) in schizophrenia

3 A total of 147 patients with schizophrenia were analyzed in the study. The mean (SD) of duration  
4 of illness and age of disease onset were 7.5 (7.0) years and 23.4 (6.9) years, respectively. The PANSS  
5 scores were 13.1 (5.1) in positive symptom, 15.8 (7.2) in negative symptom, and 28.2 (8.4) in general  
6 symptom. The medication dose was 312.8 (269.8) chlorpromazine-equivalent units at the moment of  
7 subject recruitment and FSIQ was 93.8 (12.9) units.

8 The performance of brain age modeling and nPAD are provided in Supplementary Information  
9 S3. After confirming the model performance and verifying the unbiased estimation of nPAD, the nPAD  
10 scores of the patients with schizophrenia were estimated for statistical analyses. The results of a mass  
11 one-sample *t* test revealed a significant difference in all the nPAD scores of the schizophrenia group  
12 compared with the healthy norm (nPAD-GM: 1.03 (1.82),  $t(146) = 6.89$ ,  $p < 0.001$ ; nPAD-WM: 0.84  
13 (1.83),  $t(146) = 5.59$ ,  $p < 0.001$ ; nPAD-multimodal: 1.36 (1.92),  $t(146) = 8.37$ ,  $p < 0.001$ ; adjusted by  
14 Benjamini-Hochberg correction) (Figure 2). No significant differences were observed in the nPAD  
15 scores of the test set compared with the healthy norm (nPAD-GM: -0.1 (1.40),  $t(69) = -0.60$ ,  $p = 0.553$ ;  
16 nPAD-WM: 0.00 (1.06),  $t(69) = -0.03$ ,  $p = 0.977$ ; nPAD-multimodal: -0.07 (1.30),  $t(69) = -0.43$ ,  $p =$   
17 0.667). We also determined the original PAD scores, PAD-GM: 5.56 (8.74) years; PAD-WM: 4.00  
18 (9.40) years; PAD-multimodal: 6.13 (8.36) years, which were comparable to the scores reported in the  
19 literature. Paired *t* test showed that there was no significant difference between nPAD-GM and nPAD-  
20 WM ( $t(146) = 1.03$ ,  $p = 0.304$ ), but a significant correlation was identified between these two indices  
21 ( $\rho = 0.264$ ,  $p = 0.001$ ).

22

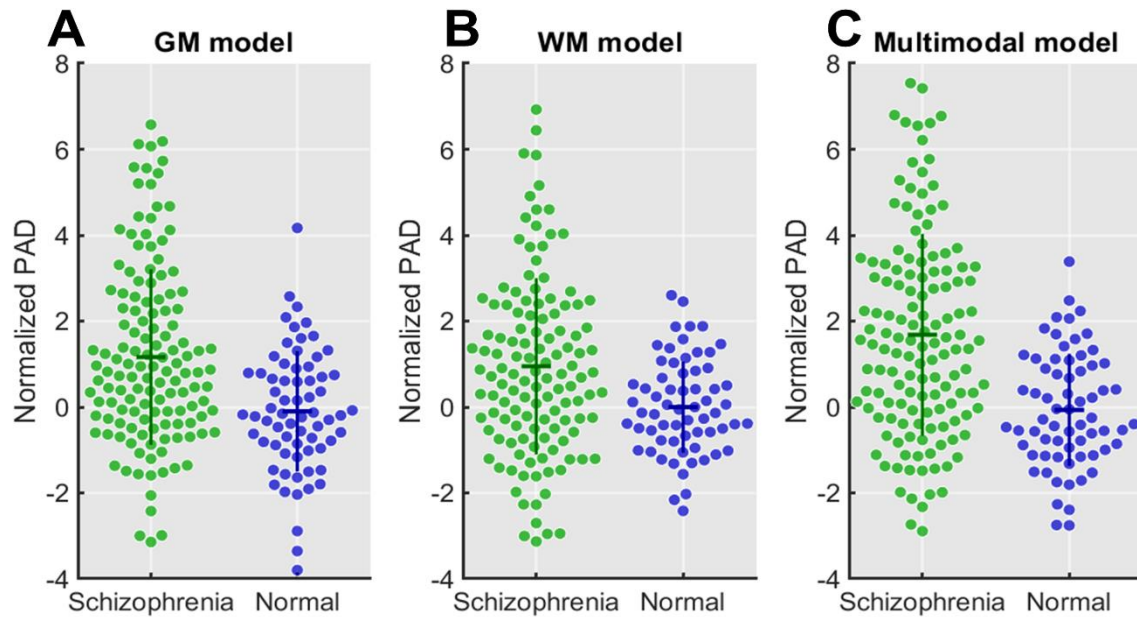

1

2 Figure 2. The beeswarm plot of normalized predicted age difference (NPAD) in Schizophrenia and the  
3 Normal (test set) based on different brain age models.

4

### 5 3.2 Regression analysis of nPAD with symptom scores and clinical factors

6 Before the regression analysis, patients with clinical factors and symptom scores exceeding  $SD =$   
7 2 were excluded ( $N = 23$ ) to minimize the result bias caused by outliers. In the regression model of  
8 nPAD with symptom scores (Table 1), only negative symptoms were significantly associated with the  
9 nPAD-WM (estimated beta = 0.103,  $p = 0.006$ ) and nPAD-multimodal scores (estimated beta = 0.110,  
10  $p = 0.026$ ). In the regression model of nPAD with clinical factors, the age of disease onset exhibited a  
11 significant negative correlation with nPAD-WM (estimated beta =  $-0.107$ ,  $p = 0.006$ ), whereas the  
12 duration of illness and antipsychotic dose did not display any significant association with any of the  
13 nPAD scores.

14

Table 1. Regression models of nPAD with clinical factors and symptom scores

|                                    | nPAD-GM   |        |               | nPAD-WM        |               |               | nPAD-Multimodal |               |               |
|------------------------------------|-----------|--------|---------------|----------------|---------------|---------------|-----------------|---------------|---------------|
|                                    | Estimated | SE     | <i>p</i> -val | Estimated      | SE            | <i>p</i> -val | Estimated       | SE            | <i>p</i> -val |
| <i>Models for clinical factors</i> |           |        |               |                |               |               |                 |               |               |
| Disease duration                   | 0.0009    | 0.0309 | 1.000         | -0.0385        | 0.0294        | 0.576         | -0.006          | 0.0356        | 1.000         |
| Onset age                          | -0.0493   | 0.0358 | 0.512         | <b>-0.1073</b> | <b>0.0340</b> | <b>0.006*</b> | -0.0831         | 0.0412        | 0.137         |
| Antipsychotic dose                 | 0.0003    | 0.0011 | 1.000         | 0.0007         | 0.0010        | 1.000         | 0.0010          | 0.0012        | 1.000         |
| <i>Models for symptom severity</i> |           |        |               |                |               |               |                 |               |               |
| Positive                           | -0.0142   | 0.0528 | 1.000         | -0.0210        | 0.0500        | 1.000         | 0.0096          | 0.0626        | 1.000         |
| Negative                           | 0.0476    | 0.0346 | 0.516         | <b>0.1028</b>  | <b>0.0328</b> | <b>0.006*</b> | <b>0.1098</b>   | <b>0.0411</b> | <b>0.026*</b> |
| General                            | -0.0043   | 0.0336 | 1.000         | -0.0159        | 0.0318        | 1.000         | -0.0359         | 0.0398        | 1.000         |

\*: with statistical significance after adjusted by Benjamini-Hochberg correction.

### 1 3.3 Association of nPAD with FSIQ

2 Patients with quotient scores outside two SDs were excluded ( $N = 47$ ) to reduce bias in the  
3 estimation. The nPAD-WM and nPAD-multimodal scores significantly explained the variance  
4 (estimated beta of nPAD-WM =  $-1.428$ ,  $p = 0.040$ ; estimated beta of nPAD-multimodal =  $-1.426$ ,  $p =$   
5  $0.037$ ; adjusted through Benjamini-Hochberg correction) in the FSIQ after adjustment for age, sex, and  
6 education years, indicating that the nPAD-WM and nPAD-multimodal scores were significantly and  
7 negatively correlated with the FSIQ. In contrast, the nPAD-GM score and FSIQ were marginally  
8 associated (estimated beta of nPAD-GM =  $-1.106$ ,  $p = 0.089$ ).

9

### 10 3.4 Structural deviance in schizophrenia based on ROI-based normative models

11 We used the ROI-based normative models to transform the structural features into Z-scores and  
12 to quantify the alterations of brain regions and tracts in patients with schizophrenia. The regions with  
13 significant alterations were identified using a mass one-sample  $t$  test for each feature with multiple  
14 comparison corrections, as displayed in Figure 3. The findings indicated that the MD index revealed  
15 more alterations than did the GFA index, and the regional volume was affected more than the cortical  
16 thickness.



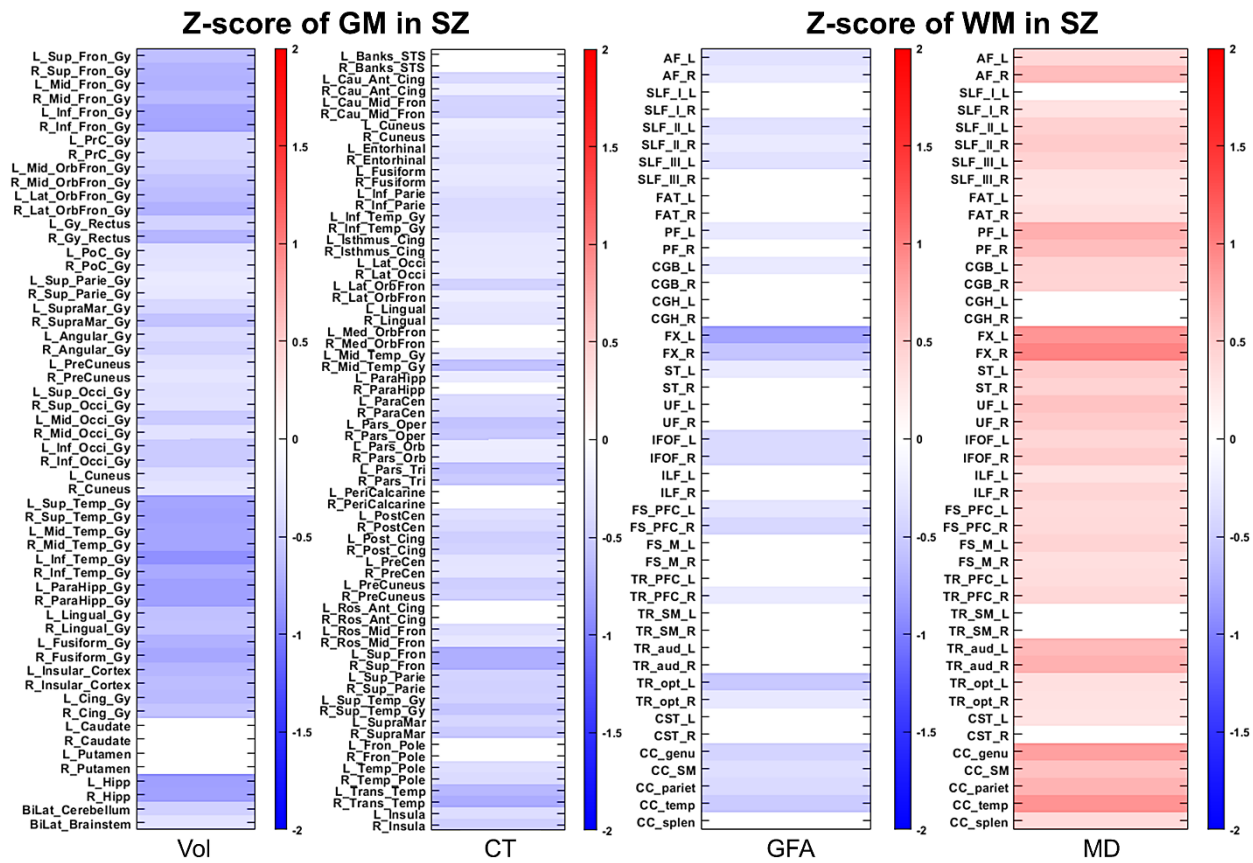

1  
2 Figure 3. The density plots of the Z-score profiles in schizophrenia. The stripes with color coding  
3 indicate that the z-scores of the regions of interest in schizophrenia are significantly distinct from the  
4 norm whereas stripes with white color indicate no significant difference from the norm. The blue and  
5 red colors denote the negative and positive z-scores, respectively. Abbreviations: GM: gray matter;  
6 WM: white matter; SZ: schizophrenia; Vol: volume; CT: cortical thickness; GFA: generalized  
7 fractional anisotropy; MD: mean diffusivity. The full name of abbreviation is provided in  
8 Supplementary eTable.

### 3.5 Regional importance of apparent aging in schizophrenia

11 To investigate which underlying impaired regions contributed the most to the significantly  
12 increased nPAD scores in patients with schizophrenia, we calculated the coefficients using CCA (CCA  
13 in GM:  $\rho = 0.995$ , CCA in WM:  $\rho = 0.988$ ) and normalized the values into a regularized range.  
14 The results are illustrated in Figure 4. Using descriptive statistics, we analyzed the importance of the

1 top-half regions in each modality that were deemed to be representative of the most impaired regions  
2 and the greatest contributors to advanced aging in schizophrenia. The measurements of feature types  
3 in GM indicated that the regional volume (63.48% contribution rate) had a stronger effect than the  
4 cortical thickness (36.52%). In the WM measures, the MD values had a much higher rate of  
5 contribution (72.92%) than the GFA values did (27.08%). We further divided the GM features into five  
6 major anatomical regions: frontal, parietal, occipital, temporal, and limbic and other regions. The  
7 frontal (37.66%) and temporal lobes (35.86%) contributed the most, followed by the limbic and other  
8 regions (13.23%), the parietal lobe regions (9.18%), and the occipital lobe (4.08%). Features in the left  
9 GM hemispheric region (56.94%) contributed more to advanced aging than did features in the right  
10 GM hemispheric region (43.06%). In addition, the WM features were partitioned into the association,  
11 projection, and callosal fiber systems. The association system exhibited the greatest contribution  
12 (62.64%), followed by the projection fiber system (21.95%) and the callosal fiber system (15.42%).  
13 Furthermore, the WM features in the left hemisphere (48.41%) and right hemisphere (51.59%)  
14 exhibited relatively similar contributions.

15

16

1

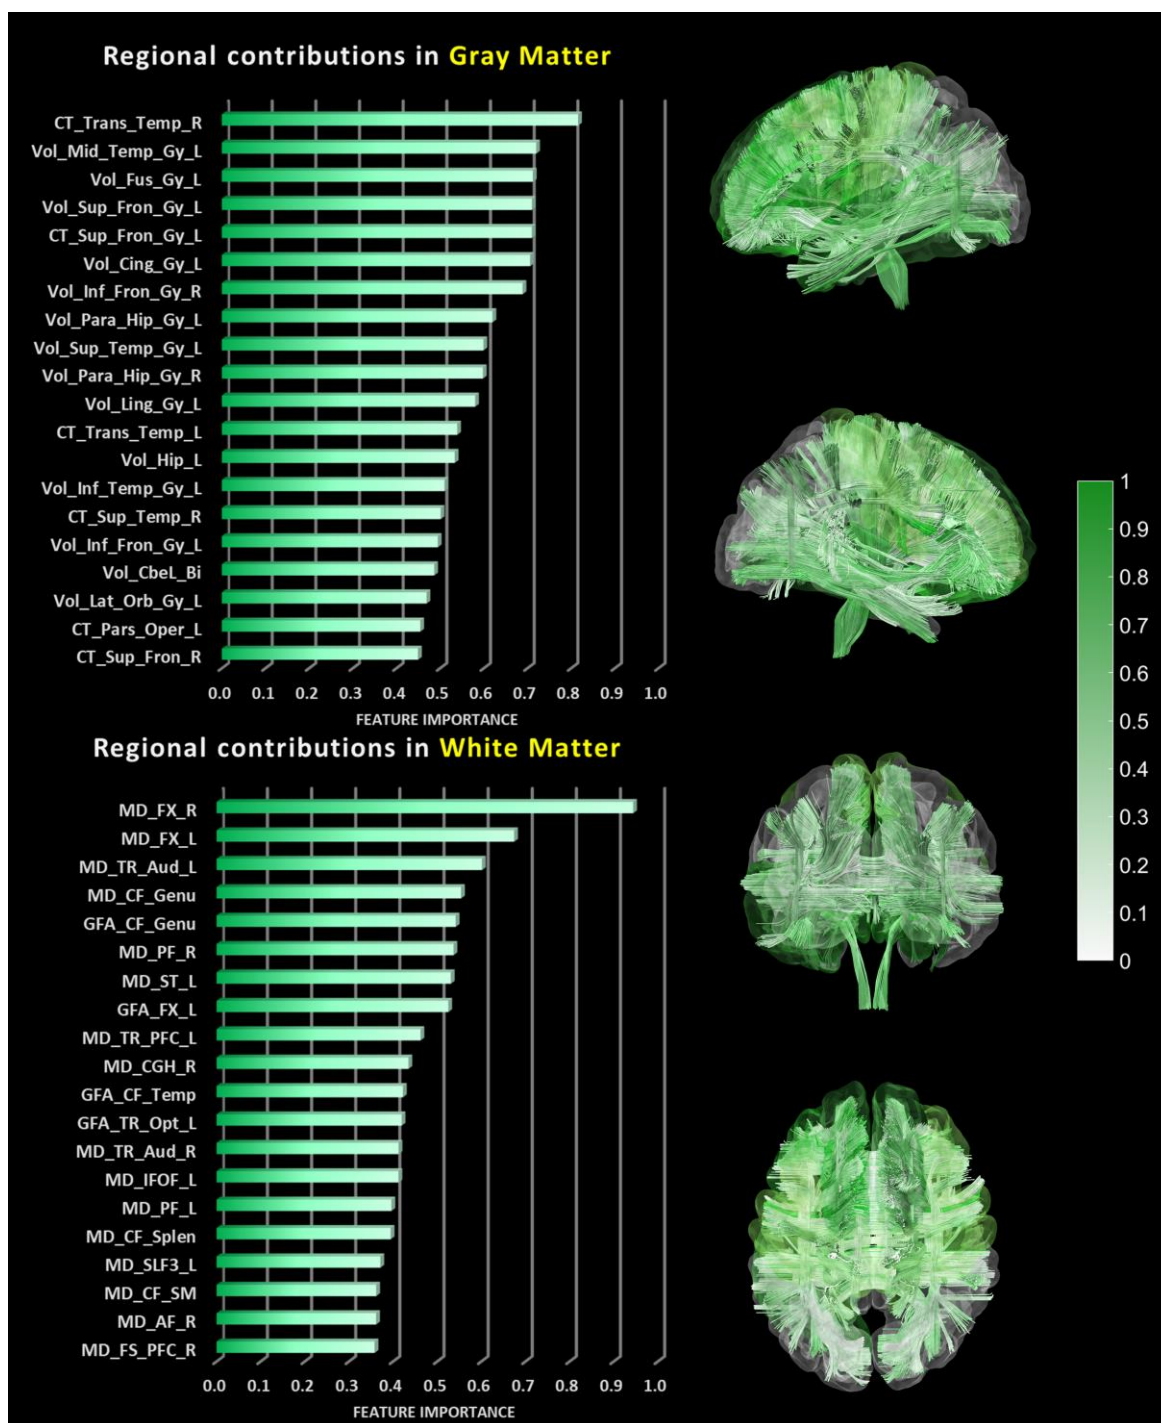

2

3 Figure 4. The bar graphs of regional importance in schizophrenia and the corresponding illustration in  
4 brain maps. The plots show the regions with the top 20 important features contributing to the  
5 normalized PAD scores of gray and white matters, respectively. The color spectrum encodes the  
6 importance of feature contribution. Abbreviations: CF: callosal fibers, CT: cortical thickness, Fus:

- 1 fusiform, FX: fornix, Gy: gyrus, GFA: generalized fractional anisotropy, Inf: inferior, Lat: lateral, MD:
- 2 mean diffusivity, Mid: middle, Par: para, Tem: temporal, TR: thalamic radiation, Vol: volume, Sup:
- 3 superior.
- 4

## 1 **4 Discussion**

2 The etiology of schizophrenia has a substantive impact on aberrant maturational trajectories of  
3 the brain and subsequently leads to group-level differences in adult patients<sup>3,45</sup>. This study  
4 demonstrated that multifaceted brain age indices were capable of reflecting premature brain aging in  
5 schizophrenia, compared with the normal population. Particularly, the multimodal brain age index best  
6 distinguished the patients from normal brain aging, confirming that the multimodal brain age index  
7 had better sensitivity of reflecting the aberrant aging process<sup>46</sup>. Of the three models, WM brain age  
8 revealed significant associations with the age of disease onset and negative symptom scores, and the  
9 WM and multimodal brain age indices showed significantly negative associations with FSIQ. We also  
10 identified GM and WM regions in the frontal and temporal areas which contributed the most to  
11 premature aging, highlighting the neuroanatomical underpinnings of brain aging in schizophrenia.

12 The brain age measures of our study showed that premature brain aging in schizophrenia resulted  
13 from diffusively impaired brain structures over the whole brain. Our results of premature aging in GM  
14 replicate the previous findings, which reported that GM brain age was 3 to 5 years older than the  
15 normal<sup>14,15,22</sup>. This discrepancy is approximately equivalent to one standard deviation apart from the  
16 normal population based on the nPAD estimation. The aberrant aging in GM primarily reflects atrophic  
17 regional volume and reduced cortical thickness, and the former might be associated with premature  
18 aging, in line with the previous neuroanatomical observation<sup>47</sup>. Moreover, these findings are congruent  
19 with previous studies reporting widespread GM volume deficits and cortical thickness reductions in  
20 schizophrenia, most pronouncedly in the frontal lobe and temporal cortex<sup>48,49</sup>. Moreover, this pattern  
21 of neuroanatomical alterations in schizophrenia has been deemed to be similar to that in frontotemporal  
22 dementia (FTD)<sup>50</sup>. FTD refers to a neurodegenerative disorder which is characterized by the profound  
23 degeneration in frontal and temporal lobes, and primarily manifested in behavioral and personality  
24 abnormalities<sup>51,52</sup>. It has been reported that schizophrenia and FTD demonstrate certain commonalities  
25 in symptoms, etiology, genetics, epigenetics, and neuroanatomy<sup>53,54</sup>. Patients with FTD showed

1 cortical atrophy and hypometabolism in frontal, temporal, cingulate, thalamic, and cerebellar regions<sup>51-</sup>  
2 <sup>53</sup>, and these abnormal regions were comparable to those observed in our GM regional contribution  
3 analysis. Additionally, the impaired structures in FTD appear to be lateralized; the left hemisphere is  
4 more severely impaired than the right hemisphere<sup>51</sup>. This also resembles our findings and previous  
5 reports in schizophrenia research<sup>51,55</sup>. Thus, we conjecture that the underlying mechanism of older  
6 brain age in schizophrenia might potentially have common causation with the process of  
7 neurodegeneration in FTD.

8         Likewise, the finding that the WM brain age was significantly older in schizophrenia is compatible  
9 with the study discovering the abnormal WM aging across the lifespan in schizophrenia<sup>56</sup>. Previous  
10 evidence has demonstrated that diffusion indices can reflect microstructural changes in WM and are  
11 sensitive to capture pathophysiological alterations in aging or mental disorders<sup>56,57</sup>. Through the use of  
12 brain age paradigm, we found that patients with schizophrenia showed group-level deviance of older-  
13 appearing brains in WM compared to their cognitively normal peers. Particularly, MD, which was  
14 deemed as a sensitive biological marker of disease and genetic liability in schizophrenia<sup>58</sup>, dominantly  
15 contributed to the observed premature aging. The MD increase might be related to tissue atrophy or  
16 fiber density reduction which might be related to pathological processes in schizophrenia<sup>58,59</sup>. Our  
17 findings also demonstrated that the association fiber system, especially those connecting to the frontal  
18 and limbic areas, played a key role in abnormal aging of WM in schizophrenia<sup>60</sup>. The impaired regions  
19 which dominantly contributed to the premature aging in schizophrenia might provide insight in  
20 treatment targeting. The WM abnormalities occur broadly in chronic patients, whereas the pathology  
21 might be confined to select fiber bundles which involve callosal fibers and those connecting to frontal  
22 and temporal areas early in the disorder<sup>61,62</sup>. In line with our findings, the fiber bundles connecting  
23 with the frontal, temporal, and limbic regions (e.g. fornix, genu, inferior fronto-occipital fasciculus,  
24 and callosal fibers connecting bilateral temporal lobes) were also substantially affected. Notably, most  
25 of these tracts functionally mature in early adulthood<sup>63</sup>, and this coincides with the time of peak risk

1 for schizophrenia<sup>61,64</sup>. It has been hypothesized that developmental timing might confer increased  
2 susceptibility to disruption of particular tracts<sup>61</sup>. A stall in WM maturation may trigger psychosis<sup>3</sup>, and  
3 this would manifest as an onset-related decline in WM integrity that has been observed<sup>65</sup>. In our results,  
4 the WM brain age index was negatively correlated with the onset age, indicating that the earlier onset  
5 might be associated with the older brain age in WM, and this might imply that the earlier the impact in  
6 the maturational brain trajectory, the more severe the disruption of brain maintenance.

7       Although both GM and WM nPAD scores exhibited premature brain aging in patients with  
8 schizophrenia, the two scores merely showed a weak correlation. This implies that a universal  
9 premature aging process of GM and WM is ongoing in schizophrenia, but the senescence of these two  
10 structural metrics does not synchronize<sup>66</sup>. This is consistent with the finding that age-related  
11 abnormalities in GM and WM follow different temporal sequences in schizophrenia<sup>67</sup>. Another  
12 possibility of the weak relationship is that distinct clinical dimensions in schizophrenia might be related  
13 to aberrant developmental and aging trajectories in specific brain tissues.

14       From the perspective of symptomatology, different symptom dimensions of schizophrenia might  
15 have different neuroanatomical underpinnings, manifesting selective impairments in different  
16 structural dimensions. For instance, one study reported that associations of positive and negative  
17 symptom scores were found in WM but not in GM<sup>68</sup>. We also found that only the WM brain age  
18 measure was correlated with the negative symptom. From the perspective of cognitive impairment, it  
19 was reported that prefrontal WM but not prefrontal GM was correlated with various aspects of  
20 intelligence, including general abilities and working memory<sup>69</sup>. Similarly, we observed a significant  
21 negative association of the WM brain age index, but not the GM brain age index, with the FSIQ,  
22 suggesting that only older WM brain age in schizophrenia might prominently connect to more  
23 cognitive deficits. Therefore, different symptom dimensions in schizophrenia might be associated with  
24 distinct neural correlates, potentially contributing to different aging trajectories in GM and WM.

25       The illness onset and progression of schizophrenia have been conceptualized as a hypothesis

1 called “early hit non-progression”<sup>23,45</sup>. In other words, the pathophysiological disruption of brain  
2 formation and reorganization occurs rapidly in the prodromal stage, and after the first episode, the  
3 progression of clinical syndromes is gradually maintained in a relatively stable phase called the “brain  
4 upkeep” phase in the chronic stage, which persists throughout the remainder of the lifespan<sup>45</sup>. Our  
5 negative finding on no associations between illness duration and brain age indices might be consistent  
6 with this hypothesis and the previous findings<sup>21,23</sup>. Although several studies claimed that the effect of  
7 aberrant brain aging became more prominent over time, especially within a short period after the  
8 disease onset<sup>14,22</sup>, we consider that, in a long-term scope, brain aging in schizophrenia might be  
9 relatively stationary in the remainder of the lifespan.

10 The findings of this study should be considered in light of several limitations. First, although we  
11 recruited a large number of patients with schizophrenia whose illness duration covered a wide range,  
12 the findings derived from the cross-sectional design are still limited to drawing inferences about  
13 individualized illness progression, which should be observed using a longitudinal design. Additionally,  
14 no demographically-matched controls were prepared for the case-control analysis. Nevertheless, a  
15 large number of cognitively normal subjects covering a broad life span suffice to offer a reliable  
16 reference for clinical samples. Finally, all of the patients used antipsychotic medication at the time of  
17 scanning. Although no correlation was found between antipsychotic medication and brain age indices,  
18 the medication effect might still be a potential confounding effect on brain aging regarding the nature  
19 of the illness. Future research is warranted to investigate the medication effect of brain aging in  
20 schizophrenia.

21 In conclusion, we have demonstrated that multifaceted brain age indices, which serve as a  
22 neuroimaging phenotype to reflect an individual’s aging status, are capable of detecting premature  
23 brain aging in schizophrenia. The WM brain age index is associated with the negative symptom severity,  
24 and the WM and multimodal brain age indices are negatively correlated with the intelligence quotient.  
25 Moreover, brain age exhibited associations with the onset age but no associations with the duration of



1 illness, which are congruent with the early hit non-progressive hypothesis. In addition, we have  
2 identified the neuroanatomical contributions of premature brain aging in schizophrenia. The  
3 contributions mainly constitute the GM regions and WM connections within the fronto-temporal circuit,  
4 which resembles those impaired in FTD. This study provides detailed investigations of brain aging in  
5 schizophrenia using bias-free multifaceted brain age indices. Our findings add new knowledge to  
6 premature aging in schizophrenia, and might aid future studies to develop imaging biomarkers for  
7 stratification and prognostication in patients with schizophrenia.

8

## 1 **5 Acknowledgments**

2 This research was supported by the National Health Research Institute (NHRI) Taiwan (grant:  
3 NHRI-EX109-10928NI) and the Taiwan Ministry of Science and Technology (106-2314-B-002-242-  
4 MY3). The authors are grateful to the participants for their participation, the research assistants for  
5 assistance with subject recruitment and administration, and the technologists for performing MRI  
6 scanning. We thank Wallace Academic Editing for assistance with English editing that greatly  
7 improved the manuscript.

## 8 **6 Conflicts of Interest**

9 The authors declare that they have no financial/non-financial and direct/potential conflict of  
10 interest.

## 11 **7 Author's Contribution**

12 C.C., T.H. and W.T. conceived the study and were in charge of overall planning. T.H., C.L., H.H.,  
13 Y.L., M.H., C.L., and Y.C. enrolled and assessed the participants. C.C., Y.T., L.Y. helped in data  
14 collection of MRI scans. C.C., Y.T., L.Y. and Y.H. performed the image analyses. C.C. designed the  
15 prediction models, and conducted the experiments, statistical analyses, and visualization of results.  
16 C.C., T.H., C.L., H.H. and W.T. contributed to the interpretation of the results. C.C., T.H. and W.T.  
17 developed the theoretical framework and wrote the manuscript. All authors discussed the results and  
18 commented on the manuscript.

## 19 **8 Ethical Approval**

20 All procedures performed in this study involving human participants from the National Taiwan  
21 University Hospital (NTUH) were in accordance with the ethical standards of the NTUH Research  
22 Ethics Committee (REC) and with the 1964 Helsinki declaration and its later amendments or  
23 comparable ethical standards. Informed consent in the study was obtained from all individual  
24 participants who were recruited in the NTUH.

25

## 1 9 References

- 2 1. Rapoport, J., Giedd, J. & Gogtay, N. Neurodevelopmental model of schizophrenia: update  
3 2012. *Molecular psychiatry* **17**, 1228-1238 (2012).
- 4 2. Pasternak, O., *et al.* Excessive extracellular volume reveals a neurodegenerative pattern in  
5 schizophrenia onset. *Journal of Neuroscience* **32**, 17365-17372 (2012).
- 6 3. Kochunov, P. & Hong, L.E. Neurodevelopmental and neurodegenerative models of  
7 schizophrenia: white matter at the center stage. *Schizophrenia bulletin* **40**, 721-728 (2014).
- 8 4. Lawrie, S.M., McIntosh, A.M., Hall, J., Owens, D.G. & Johnstone, E.C. Brain structure and  
9 function changes during the development of schizophrenia: the evidence from studies of  
10 subjects at increased genetic risk. *Schizophrenia bulletin* **34**, 330-340 (2008).
- 11 5. Padmanabhan, J.L., *et al.* Correlations between brain structure and symptom dimensions of  
12 psychosis in schizophrenia, schizoaffective, and psychotic bipolar I disorders. *Schizophrenia*  
13 *bulletin* **41**, 154-162 (2015).
- 14 6. Brugger, S.P. & Howes, O.D. Heterogeneity and homogeneity of regional brain structure in  
15 schizophrenia: a meta-analysis. *JAMA psychiatry* **74**, 1104-1111 (2017).
- 16 7. Vita, A., De Peri, L., Deste, G. & Sacchetti, E. Progressive loss of cortical gray matter in  
17 schizophrenia: a meta-analysis and meta-regression of longitudinal MRI studies.  
18 *Translational psychiatry* **2**, e190-e190 (2012).
- 19 8. Torres, U.S., *et al.* Patterns of regional gray matter loss at different stages of schizophrenia: a  
20 multisite, cross-sectional VBM study in first-episode and chronic illness. *NeuroImage:*  
21 *Clinical* **12**, 1-15 (2016).
- 22 9. van Haren, N.E., *et al.* Changes in cortical thickness during the course of illness in  
23 schizophrenia. *Archives of general psychiatry* **68**, 871-880 (2011).
- 24 10. Lemaitre, H., *et al.* Normal age-related brain morphometric changes: nonuniformity across  
25 cortical thickness, surface area and gray matter volume? *Neurobiology of aging* **33**, 617.  
26 e611-617. e619 (2012).
- 27 11. Kelly, S., *et al.* Widespread white matter microstructural differences in schizophrenia across  
28 4322 individuals: results from the ENIGMA Schizophrenia DTI Working Group. *Molecular*  
29 *psychiatry* **23**, 1261-1269 (2018).
- 30 12. Nazeri, A., *et al.* Alterations of superficial white matter in schizophrenia and relationship to  
31 cognitive performance. *Neuropsychopharmacology* **38**, 1954-1962 (2013).
- 32 13. Voineskos, A.N., *et al.* Diffusion tensor tractography findings in schizophrenia across the  
33 adult lifespan. *Brain* **133**, 1494-1504 (2010).
- 34 14. Koutsouleris, N., *et al.* Accelerated brain aging in schizophrenia and beyond: a  
35 neuroanatomical marker of psychiatric disorders. *Schizophr Bull* **40**, 1140-1153 (2014).
- 36 15. Nenadić, I., Dietzek, M., Langbein, K., Sauer, H. & Gaser, C. BrainAGE score indicates  
37 accelerated brain aging in schizophrenia, but not bipolar disorder. *Psychiatry Research:*  
38 *Neuroimaging* **266**, 86-89 (2017).
- 39 16. Cole, J.H. & Franke, K. Predicting Age Using Neuroimaging: Innovative Brain Ageing  
40 Biomarkers. *Trends Neurosci* **40**, 681-690 (2017).
- 41 17. Chen, C.L., *et al.* Premature white matter aging in patients with right mesial temporal lobe  
42 epilepsy: A machine learning approach based on diffusion MRI data. *Neuroimage Clin* **24**,  
43 102033 (2019).
- 44 18. Kaufmann, T., *et al.* Common brain disorders are associated with heritable patterns of  
45 apparent aging of the brain. *Nat Neurosci* **22**, 1617-1623 (2019).
- 46 19. Cole, J.H., Leech, R., Sharp, D.J. & Alzheimer's Disease Neuroimaging, I. Prediction of brain  
47 age suggests accelerated atrophy after traumatic brain injury. *Ann Neurol* **77**, 571-581 (2015).
- 48 20. Nenadic, I., Dietzek, M., Langbein, K., Sauer, H. & Gaser, C. BrainAGE score indicates  
49 accelerated brain aging in schizophrenia, but not bipolar disorder. *Psychiatry Res*

- 1 *Neuroimaging* **266**, 86-89 (2017).
- 2 21. Hajek, T., *et al.* Brain Age in Early Stages of Bipolar Disorders or Schizophrenia. *Schizophr*  
3 *Bull* **45**, 190-198 (2019).
- 4 22. Schnack, H.G., *et al.* Accelerated brain aging in schizophrenia: a longitudinal pattern  
5 recognition study. *American Journal of Psychiatry* **173**, 607-616 (2016).
- 6 23. Shahab, S., *et al.* Brain structure, cognition, and brain age in schizophrenia, bipolar disorder,  
7 and healthy controls. *Neuropsychopharmacology* **44**, 898-906 (2019).
- 8 24. Smith, S.M., Vidaurre, D., Alfaro-Almagro, F., Nichols, T.E. & Miller, K.L. Estimation of  
9 brain age delta from brain imaging. *Neuroimage* **200**, 528-539 (2019).
- 10 25. Marquand, A.F., *et al.* Conceptualizing mental disorders as deviations from normative  
11 functioning. *Mol Psychiatry* **24**, 1415-1424 (2019).
- 12 26. Kaufman, A.S. & Lichtenberger, E.O. *Assessing adolescent and adult intelligence*, (John  
13 Wiley & Sons, 2005).
- 14 27. Chen, H.-Y., Hua, M.-S., Zhu, J. & Chen, Y.-H. Selection of factor-based WAIS-III tetrads in  
15 the Taiwan standardization sample: a guide to clinical practice. *Chin J Psychol* **50**, 91-109  
16 (2008).
- 17 28. Reese, T.G., Heid, O., Weisskoff, R.M. & Wedeen, V.J. Reduction of eddy-current-induced  
18 distortion in diffusion MRI using a twice-refocused spin echo. *Magn Reson Med* **49**, 177-182  
19 (2003).
- 20 29. Wedeen, V.J., Hagmann, P., Tseng, W.Y., Reese, T.G. & Weisskoff, R.M. Mapping complex  
21 tissue architecture with diffusion spectrum magnetic resonance imaging. *Magn Reson Med*  
22 **54**, 1377-1386 (2005).
- 23 30. Kuo, L.W., Chen, J.H., Wedeen, V.J. & Tseng, W.Y. Optimization of diffusion spectrum  
24 imaging and q-ball imaging on clinical MRI system. *Neuroimage* **41**, 7-18 (2008).
- 25 31. Gaser, C. & Dahnke, R. CAT-a computational anatomy toolbox for the analysis of structural  
26 MRI data. *HBM* **2016**, 336-348 (2016).
- 27 32. Ashburner, J., *et al.* SPM12 Manual. Wellcome Trust Centre for Neuroimaging, London.  
28 (2014).
- 29 33. Shattuck, D.W., *et al.* Construction of a 3D probabilistic atlas of human cortical structures.  
30 *Neuroimage* **39**, 1064-1080 (2008).
- 31 34. Dahnke, R., Ziegler, G. & Gaser, C. Local Adaptive Segmentation. Beijing. HBM. (2012).
- 32 35. Desikan, R.S., *et al.* An automated labeling system for subdividing the human cerebral cortex  
33 on MRI scans into gyral based regions of interest. *Neuroimage* **31**, 968-980 (2006).
- 34 36. Chen, Y.J., *et al.* Automatic whole brain tract-based analysis using predefined tracts in a  
35 diffusion spectrum imaging template and an accurate registration strategy. *Human brain*  
36 *mapping* **36**, 3441-3458 (2015).
- 37 37. Özarıslan, E., *et al.* Mean apparent propagator (MAP) MRI: a novel diffusion imaging method  
38 for mapping tissue microstructure. *NeuroImage* **78**, 16-32 (2013).
- 39 38. Hsu, Y.C. & Tseng, W.Y. An efficient regularization method for diffusion MAP-MRI  
40 estimation. *2018 ISMRM-ESMRMB Joint Annual Meeting* (2018).
- 41 39. Hsu, Y.C., Hsu, C.H. & Tseng, W.Y. A large deformation diffeomorphic metric mapping  
42 solution for diffusion spectrum imaging datasets. *Neuroimage* **63**, 818-834 (2012).
- 43 40. Chen, C.-L., *et al.* Generalization of diffusion magnetic resonance imaging-based brain age  
44 prediction model through transfer learning. *NeuroImage*, 116831 (2020).
- 45 41. Rasmussen, C.E. & Williams, C.K. Gaussian processes in machine learning. *Lecture notes in*  
46 *computer science* **3176**, 63-71 (2004).
- 47 42. Marquand, A.F., Rezek, I., Buitelaar, J. & Beckmann, C.F. Understanding Heterogeneity in  
48 Clinical Cohorts Using Normative Models: Beyond Case-Control Studies. *Biol Psychiatry* **80**,  
49 552-561 (2016).
- 50 43. Benjamini, Y. & Hochberg, Y. Controlling the false discovery rate: a practical and powerful

- 1 approach to multiple testing. *Journal of the Royal statistical society: series B*  
2 (*Methodological*) **57**, 289-300 (1995).
- 3 44. Thompson, B. Canonical correlation analysis. *Encyclopedia of statistics in behavioral science*  
4 (2005).
- 5 45. Millan, M.J., *et al.* Altering the course of schizophrenia: progress and perspectives. *Nat Rev*  
6 *Drug Discov* **15**, 485-515 (2016).
- 7 46. Cole, J.H. Multimodality neuroimaging brain-age in UK biobank: relationship to biomedical,  
8 lifestyle, and cognitive factors. *Neurobiol Aging* **92**, 34-42 (2020).
- 9 47. Rimol, L.M., *et al.* Cortical volume, surface area, and thickness in schizophrenia and bipolar  
10 disorder. *Biological psychiatry* **71**, 552-560 (2012).
- 11 48. Goldman, A.L., *et al.* Widespread reductions of cortical thickness in schizophrenia and  
12 spectrum disorders and evidence of heritability. *Archives of general psychiatry* **66**, 467-477  
13 (2009).
- 14 49. Zipursky, R.B., Lim, K.O., Sullivan, E.V., Brown, B.W. & Pfefferbaum, A. Widespread  
15 cerebral gray matter volume deficits in schizophrenia. *Archives of general psychiatry* **49**,  
16 195-205 (1992).
- 17 50. Meeter, L.H., Kaat, L.D., Rohrer, J.D. & van Swieten, J.C. Imaging and fluid biomarkers in  
18 frontotemporal dementia. *Nat Rev Neurol* **13**, 406-419 (2017).
- 19 51. Harciarek, M., Malaspina, D., Sun, T. & Goldberg, E. Schizophrenia and frontotemporal  
20 dementia: shared causation? *Int Rev Psychiatry* **25**, 168-177 (2013).
- 21 52. Kerssens, C.J., *et al.* Schizophrenia as a mimic of behavioral variant frontotemporal  
22 dementia. *Neurocase* **22**, 285-288 (2016).
- 23 53. Cipriani, G., Danti, S., Nuti, A., Di Fiorino, M. & Cammisuli, D.M. Is that schizophrenia or  
24 frontotemporal dementia? Supporting clinicians in making the right diagnosis. *Acta Neurol*  
25 *Belg* **120**, 799-804 (2020).
- 26 54. Cooper, J.J. & Ovsiew, F. The relationship between schizophrenia and frontotemporal  
27 dementia. *J Geriatr Psychiatry Neurol* **26**, 131-137 (2013).
- 28 55. Oertel-Knöchel, V. & Linden, D.E. Cerebral asymmetry in schizophrenia. *The Neuroscientist*  
29 **17**, 456-467 (2011).
- 30 56. Cetin-Karayumak, S., *et al.* White matter abnormalities across the lifespan of schizophrenia:  
31 a harmonized multi-site diffusion MRI study. *Mol Psychiatry* (2019).
- 32 57. Cox, S.R., *et al.* Ageing and brain white matter structure in 3,513 UK Biobank participants.  
33 *Nat Commun* **7**, 13629 (2016).
- 34 58. Narr, K.L., *et al.* Mean diffusivity: a biomarker for CSF-related disease and genetic liability  
35 effects in schizophrenia. *Psychiatry Research: Neuroimaging* **171**, 20-32 (2009).
- 36 59. Clark, K.A., *et al.* Mean diffusivity and fractional anisotropy as indicators of disease and  
37 genetic liability to schizophrenia. *Journal of psychiatric research* **45**, 980-988 (2011).
- 38 60. Stephan, K.E., Baldeweg, T. & Friston, K.J. Synaptic plasticity and dysconnection in  
39 schizophrenia. *Biological psychiatry* **59**, 929-939 (2006).
- 40 61. Di Biase, M.A., Pantelis, C. & Zalesky, A. White Matter Pathology in Schizophrenia. in  
41 *Neuroimaging in Schizophrenia* 71-91 (Springer, 2020).
- 42 62. Di Biase, M., *et al.* White matter connectivity disruptions in early and chronic schizophrenia.  
43 *Psychological Medicine* **47**, 2797 (2017).
- 44 63. Lebel, C., *et al.* Diffusion tensor imaging of white matter tract evolution over the lifespan.  
45 *Neuroimage* **60**, 340-352 (2012).
- 46 64. Ellison-Wright, I. & Bullmore, E. Meta-analysis of diffusion tensor imaging studies in  
47 schizophrenia. *Schizophrenia research* **108**, 3-10 (2009).
- 48 65. Carletti, F., *et al.* Alterations in white matter evident before the onset of psychosis.  
49 *Schizophrenia bulletin* **38**, 1170-1179 (2012).
- 50 66. Cropley, V.L., *et al.* Accelerated Gray and White Matter Deterioration With Age in

- 1 Schizophrenia. *Am J Psychiatry* **174**, 286-295 (2017).  
2 67. Cropley, V.L., *et al.* Accelerated gray and white matter deterioration with age in  
3 schizophrenia. *American Journal of Psychiatry* **174**, 286-295 (2017).  
4 68. Moriya, J., *et al.* Gray and white matter volumetric and diffusion tensor imaging (DTI)  
5 analyses in the early stage of first-episode schizophrenia. *Schizophrenia research* **116**, 196-  
6 203 (2010).  
7 69. Nestor, P.G., *et al.* Comparing prefrontal gray and white matter contributions to intelligence  
8 and decision making in schizophrenia and healthy controls. *Neuropsychology* **24**, 121 (2010).  
9  
10

## **Supplementary Information**

S1 Brain Age Estimation

S2 Image Data Processing

S3 Results of Brain Age Models and Normalized Predicted Age Difference Estimation

References

## **S1 Brain Age Estimation**

### **S1.1 Participants**

The brain age models were created by using the neuroimaging data from National Taiwan University Hospital (NTUH) database. This database contained a training set (N = 482) and a test set (N = 70), which were used to establish brain age models and evaluate model performance, respectively (training set: mean age = 36.9 years, max = 92, min = 14, female proportion = 53.1%; test set: mean age = 36.8 years, max = 83, min = 14, female proportion = 52.2%). The distributions of age and sex in the 2 sets were statistically identical. The participants of the 2 sets were cognitively normal and met the recruitment criteria, including a Mini-Mental State Examination score of 25 or above, no self-reported substance abuse, no brain injury and brain surgery, no current experience of serious health problems, and no history of neurological diseases or psychiatric disorders. Participants who did not meet the safety and health-related criteria for MRI scanning were excluded.

### **S1.2 Establishment of Brain Age Prediction Models**

The details of the MRI imaging parameters and image processing are described in S2. After conducting image processing, the input data for gray matter (GM)-based brain age modeling used the volume and cortical thickness features in regions of interest (ROIs), whereas that for white matter (WM)-based brain age modeling used the tract-specific features of generalized fractional anisotropy (GFA) and mean diffusivity (MD). Consequently, the neuroimaging features of the GM- and WM-based model input consisted of 124 and 90 features, respectively. The sex factor was also included as



a predictor in the models. Twelve-layer feed-forward cascade neural network models, which provide an accurate prediction with flexible model architecture for transfer learning, were used to predict age (4). The cascade neural network is a feed-forward neural network involving connections from the input and every previous layer to the subsequent layer. This network is similar to a simplified fully connected version of a dense block in densely connected convolutional networks, which avoid the vanishing-gradient problem and strengthen feature propagation (5). The loss function of model optimization was specified as a mean square error function, which was optimized using a gradient descent algorithm with an adaptive learning rate and constant momentum. A 10-fold cross-validation procedure was adopted within the training set to estimate brain age model performance. Validation set performance was used to stop the model parameter updates. The training procedure was implemented using MATLAB R2019a (MathWorks Inc., Natick, MA, USA) with an NVIDIA GeForce RTX 2080Ti (NVIDIA Inc., Santa Clara, CA, USA) graphics processing unit for accelerated computing. The performance of the trained brain age models was tested by predicting the brain age of individuals in the test set. To quantify model performance, Pearson's correlation coefficient and mean absolute error between the predicted age and chronological age were calculated. The results of brain age modeling are provided in Supplementary Information S3.

## S2 Image Data Processing

### S2.1 MRI Imaging Parameters

The neuroimaging data in the NTUH database were acquired using a 3T Siemens TIM Trio scanner with a 32-channel phased-array head coil, with the same imaging protocol used for all data collection. High-resolution T1-weighted imaging was performed using a 3D magnetization-prepared rapid gradient echo (3D-MPRAGE) sequence: repetition time/echo time (TR/TE) = 2000/3 ms, flip angle = 9°, field of view (FOV) = 256 × 192 × 208 mm<sup>3</sup>, and acquisition matrix = 256 × 192 × 208; this resulted in an isotropic spatial resolution of 1 mm<sup>3</sup>. The imaging protocol for diffusion-weighted images followed that designed for diffusion spectrum imaging (DSI). The DSI datasets were acquired using the diffusion pulsed-gradient spin-echo echo-planar imaging sequence with a twice-refocused balanced echo (1, 2): TR/TE = 9600/130 ms, slice thickness = 2.5 mm, acquisition matrix = 80 × 80, FOV = 200 × 200 mm<sup>2</sup>, and in-plane spatial resolution = 2.5 × 2.5 mm<sup>2</sup>. The diffusion-encoding acquisition scheme used in this dataset followed the DSI framework published previously (2), in which 102 diffusion-encoding gradients were applied corresponding to the Cartesian grids in the half sphere of the 3D diffusion-encoding space (*q*-space) within a radius of 3 units equivalent to  $b_{\max} = 4000 \text{ s/mm}^2$  (3). Because the *q*-space data were real and symmetrical around the origin, the acquired half-sphere data were projected to fill the other half of the sphere.

### S2.2 Image Quality Assurance

Before we performed data analysis, all T1-weighted images underwent quality assurance (QA)

procedures which are included in the Computational Anatomy Toolbox 12 (CAT12; <http://dbm.neuro.uni-jena.de/cat.html>), a novel retrospective QA framework for empirical quantification of quality differences. Retrospective QA involved automatic evaluation of essential image qualities such as noise, inhomogeneity, and image resolution. These quality measures were scaled to a rating scale, and “good” image quality level was required. Additional visual inspection was conducted to examine whether artifacts, including severe motion and abnormal lesions, remained in the images. All diffusion datasets also underwent QA procedures, including examinations for the signal-to-noise ratio (SNR), degree of alignment between T1- and diffusion-weighted images, and the motion-induced signal dropout (6). The SNR was evaluated by calculating the mean signal of an object divided by the standard deviation (SD) of the background noise (7). In practice, the signal was determined using a central square of an image for each slice, and the noise was averaged from 4 corner regions. Diffusion datasets with an SNR higher than mean SNR minus 2.5 SDs at their site were included. The degree of within-subject alignment between T1- and diffusion-weighted images was evaluated by calculating the spatial correlation between the T1-weighted image-derived WM tissue probability map and the diffusion-weighted image-derived GFA map. Higher spatial correlation indicated greater spatial alignment between T1- and diffusion-weighted images. In addition, because of the relatively long scan time of DSI, in-scanner head motion would inevitably cause signal dropout in diffusion-weighted images, particularly in those with high  $b$  values. For this reason, all participants lay on the MRI table with the head packed with expandable foam cushions to restrict head movement.

All acquired DSI datasets (5,712 images per participant) were examined by comparing the signal in the central square of each image with the predicted signal attenuation. Signal deviation from the predicted distribution was considered signal loss. Data with more than 60 images of signal dropout per participant (1% of the total diffusion-weighted images) were discarded.

### **S2.3 Image Feature Processing**

In the image feature processing for GM, voxel-based morphometry and surface-based morphometry were used to analyze the 3D MPRAGE data. The image analyses were performed using an extension of the Statistical Parametric Mapping package (SPM12; Wellcome Department of Imaging Neuroscience, London, UK; [www.fil.ion.ucl.ac.uk/spm](http://www.fil.ion.ucl.ac.uk/spm)) (8) called CAT12. For voxel-based morphometry analysis, the structural imaging data were preprocessed using the default settings of the CAT12 toolbox, including corrections for bias-field inhomogeneity and segmentation into GM, WM, and cerebrospinal fluid, followed by spatial normalization to the ICBM template in MNI space (voxel size:  $1.5 \times 1.5 \times 1.5$  mm<sup>3</sup>) with SHOOT registration (9). The LONI probabilistic brain atlas, containing 56 ROIs, was used as a reference of volumetric tissue compartments (10) to estimate the volume of each ROI. For surface-based morphometry analysis of cortical thickness, we applied the automated surface-preprocessing algorithms included in the CAT12 toolbox that enable the estimation of cortical thickness of the left and right hemispheres by using the projection-based thickness method (11). Here, cortical thickness was determined by estimating the WM distance based on tissue segmentation. We used WM distance and a derived neighbor relationship to project local maxima (which is equal to the

cortical thickness) onto other GM voxels. This approach included partial volume correction and correction for sulcal blurring and sulcal asymmetries. The Desikan–Killiany cortical atlas containing 68 cortical ROIs was employed to sample cortical features (12). In this manner, 56 volumetric features and 68 cortical thickness features were obtained to estimate GM-based brain age.

In the image processing for WM, we used an in-house algorithm called tract-based automatic analysis (13). First, the diffusion indices, including GFA and MD, derived from the diffusion MRI dataset were computed using the regularization version of the framework of mean apparent propagator (MAP)-MRI (14, 15). The signal in 3D diffusion-encoding space was fitted with a series expansion of Hermite basis functions, which describe diffusion in various microstructural geometries (16). The zero-order term in the expansion series contained the diffusion tensor that characterizes the Gaussian displacement distribution. Higher-order terms in the expansion series were the orthogonal corrections to the Gaussian approximation, and these were used for reconstructing the average propagator. The MD in each voxel was determined by calculating the mean of the 3 eigenvalues of the diffusion tensor (17, 18). We quantified GFA as the SD of the orientation distribution function divided by the root mean square of the orientation distribution function (19). To extract effective features of WM, the diffusion indices were sampled according to the spatial coordinates of 45 predefined major fiber tract bundles over the whole brain, which were constructed in the DSI template NTU-DSI-122 (20) through deterministic streamline-based tractography with multiple ROIs defined in the automated anatomical labeling atlas (21). In practice, the sampling coordinates were transformed from NTU-DSI-122 into

individual DSI datasets with the corresponding deformation maps. The deformation maps were obtained through 2-step registration, which included anatomical information provided by the T1-weighted images (22) and microstructural information provided by the DSI datasets (23). The sampling coordinates were aligned with the proceeding direction of each fiber tract bundle, and diffusion indices were sampled in the native space along the sampling coordinates normalized and divided into 100 steps. Having sampled the diffusion indices, we averaged the indices across 100 steps along each tract bundle. Finally, 45 GFA features and 45 MD features were obtained for estimating WM-based brain age.

### **S3 Results of Brain Age Models and Normalized Predicted Age Difference**

#### **Estimation**

We performed 10-fold cross-validation on the training set and the brain age models showed a strong linear correlation and low MAE between chronological age and predicted age based on GM features ( $\rho = 0.956$ , MAE = 4.34), WM features ( $\rho = 0.944$ , MAE = 4.76), and multimodal features ( $\rho = 0.963$ , MAE = 3.99). The models also accurately predicted the brain age in the independent test set on the basis of GM features ( $\rho = 0.943$ , MAE = 4.69), WM features ( $\rho = 0.967$ , MAE = 3.95), and multimodal features ( $\rho = 0.969$ , MAE = 3.97). Supplementary Figure 1 displays scatter plots of the predicted brain age in both the training and test sets.

After the brain age models were developed, normalization of predicted age difference (PAD) was conducted to minimize age-related bias (Supplementary Table 1). The results indicated that the approach was effective. For instance, the original PAD derived from the multimodal brain age model had a significant negative correlation with chronological age in both the training set ( $\rho = -0.287$ ,  $p < 0.001$ ) and test set ( $\rho = -0.308$ ,  $p = 0.009$ ), as displayed in Figures 1G and 1H, respectively. After the predicted age was transformed into the normalized PAD (nPAD), the index did not show significant statistical bias with respect to chronological age in the training and test sets ( $\rho = 0.013$ ,  $p = 0.781$ , and  $\rho = 0.028$ ,  $p = 0.819$ , respectively), suggesting that the brain age indices were free of bias and could be used for further analyses.

| Models           | Sets         | Correlation b/w PAD and age | Correlation b/w nPAD and age |
|------------------|--------------|-----------------------------|------------------------------|
| GM-based         | training set | rho = -0.342<br>$p < 0.001$ | rho = 0.026<br>$p = 0.575$   |
|                  | test set     | rho = -0.365<br>$p = 0.002$ | rho = -0.031<br>$p = 0.800$  |
| WM-based         | training set | rho = -0.358<br>$p < 0.001$ | rho = -0.016<br>$p = 0.726$  |
|                  | test set     | rho = -0.397<br>$p = 0.007$ | rho = 0.054<br>$p = 0.656$   |
| Multimodal-based | training set | rho = -0.287<br>$p < 0.001$ | rho = 0.013<br>$p = 0.781$   |
|                  | test set     | rho = -0.308<br>$p = 0.009$ | rho = 0.028<br>$p = 0.819$   |

Supplementary table 1. The linear correlation of PAD and nPAD with chronological age in the training and test sets.



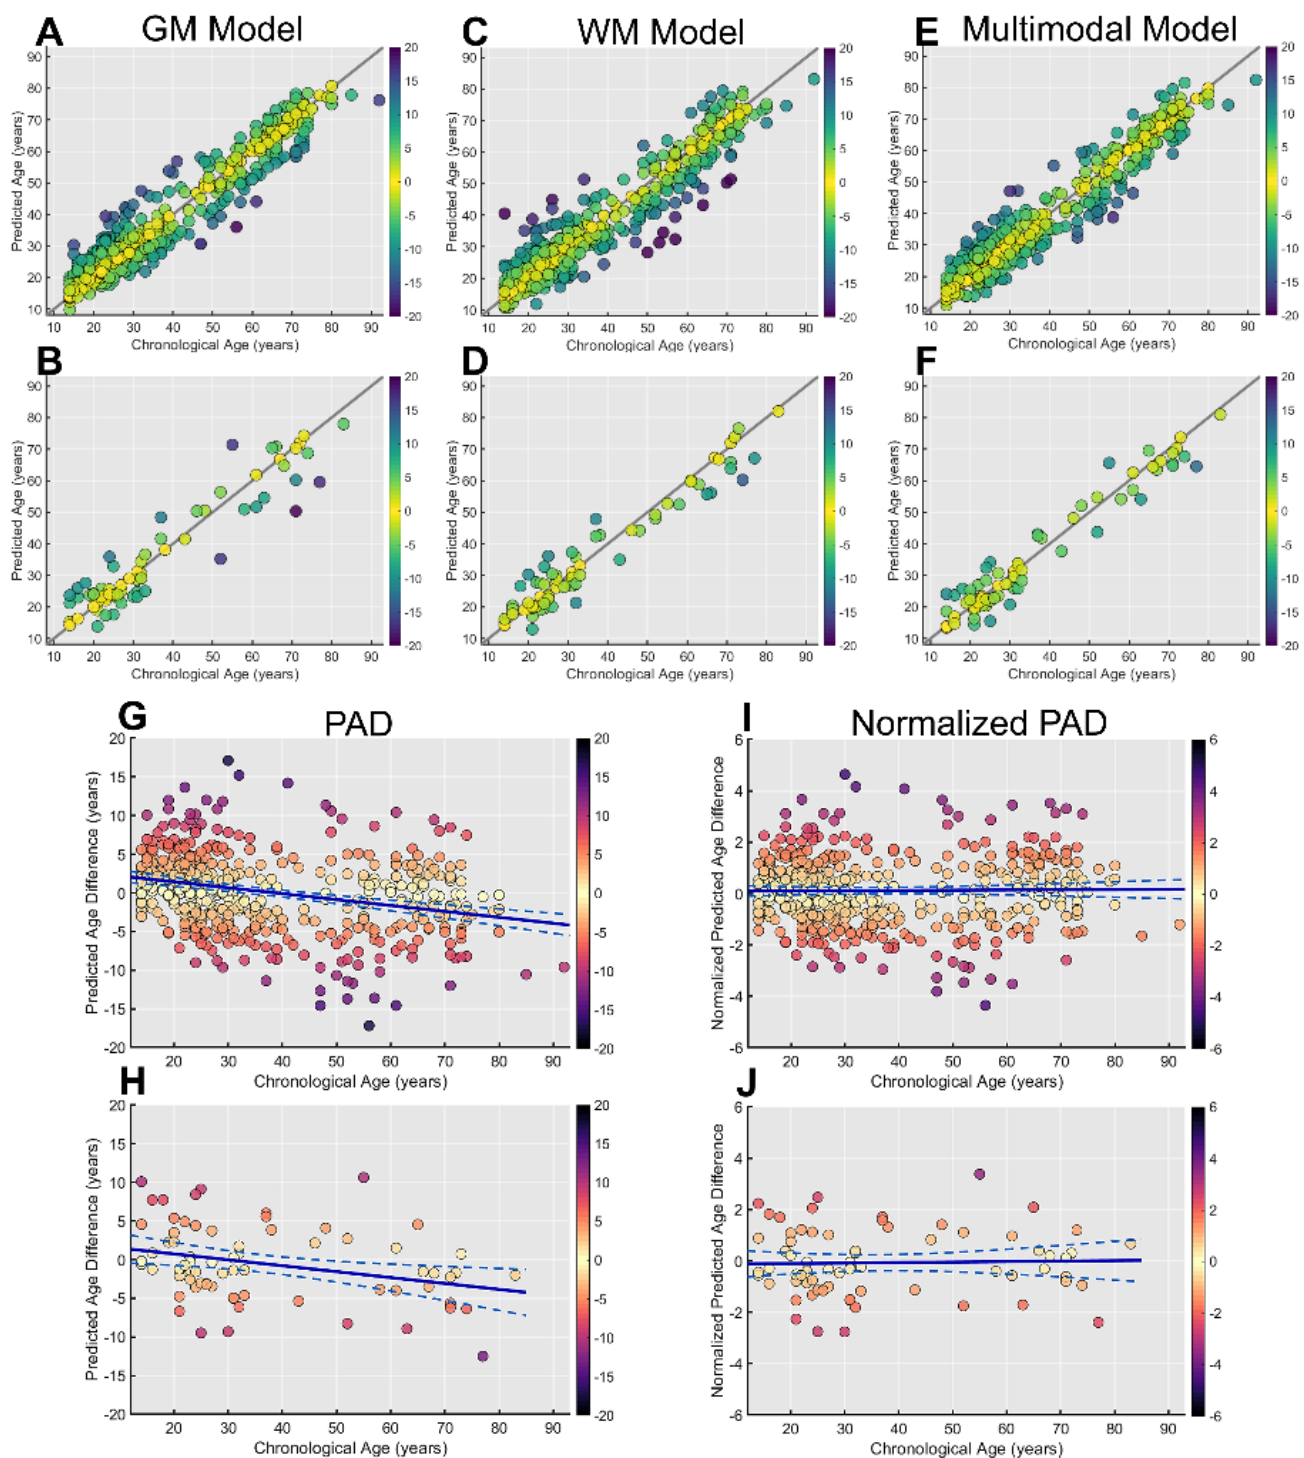

Supplementary Figure 1. The scatter plots of chronological age against the predicted age derived from the brain age models in either the training set (A, C, E) or test set (B, D, F). The scatter plots of chronological age against the predicted age difference (PAD) are shown in the training set (G) and test

set (H), and the scatter plots of chronological age against the normalized PAD are shown in the training

set (I) and test set (J). Note that normalized PAD does not have age-related bias.

## References

1. Reese, T.G., Heid, O., Weisskoff, R.M., Wedeen, V.J., 2003. Reduction of eddy-current-induced distortion in diffusion MRI using a twice-refocused spin echo. *Magn. Reson. Med.* 49, 177–182.
2. Wedeen, V.J., Hagmann, P., Tseng, W.Y., Reese, T.G., Weisskoff, R.M., 2005. Mapping complex tissue architecture with diffusion spectrum magnetic resonance imaging. *Magn. Reson. Med.* 54, 1377–1386.
3. Kuo, L.W., Chen, J.H., Wedeen, V.J., Tseng, W.Y., 2008. Optimization of diffusion spectrum imaging and q-ball imaging on clinical MRI system. *Neuroimage.* 41, 7–18.
4. Chen C. L. et al., 2020. Generalization of diffusion magnetic resonance imaging-based brain age prediction model through transfer learning. *Neuroimage* 217:116831.
5. Huang, G., Liu, Z., Van Der Maaten, L., Weinberger, K.Q., 2017. Densely connected convolutional networks, in *Proceedings of the IEEE Conference on Computer Vision and Pattern Recognition*. pp. 2261–2269.
6. Chen, C. L. et al., 2019. Premature white matter aging in patients with right mesial temporal lobe epilepsy: A machine learning approach based on diffusion MRI data. *Neuroimage Clin* 24, 102033, doi:10.1016/j.nicl.2019.102033.
7. Dietrich, O., Raya, J.G., Reeder, S.B., Reiser, M.F., Schoenberg, S.O., 2007. Measurement of signal-to-noise ratios in MR images: influence of multichannel coils, parallel imaging, and reconstruction filters. *J. Magn. Reson. Imaging.* 26, 375–385.

8. Ashburner, J., Barnes, G., Chen, C., Daunizeau, J., Flandin, G., Friston, K., Kiebel, S., Kilner, J., Litvak, V., Moran, R., 2014. SPM12 manual. Wellcome Trust Centre for Neuroimaging, London, UK, 2464.
9. Ashburner, J., Friston, K.J., 2011. Diffeomorphic registration using geodesic shooting and Gauss-Newton optimisation. *Neuroimage*. 55, 954–967.
10. Shattuck, D.W., Mirza, M., Adisetiyo, V., Hojatkashani, C., Salamon, G., Narr, K.L., Poldrack, R.A., Bilder, R.M., Toga, A.W., 2008. Construction of a 3D probabilistic atlas of human cortical structures. *Neuroimage* 39, 1064-1080.
11. Dahnke, R., Ziegler, G., Gaser, C., 2012. Local adaptive segmentation. Beijing. HBM. Available online at: <http://dbm.neuro.uni-jena.de/HBM2012/HBM2012-Dahnke02.pdf>.
12. Desikan, R.S., Ségonne, F., Fischl, B., Quinn, B.T., Dickerson, B.C., Blacker, D., Buckner, R.L., Dale, A.M., Maguire, R.P., Hyman, B.T., 2006. An automated labeling system for subdividing the human cerebral cortex on MRI scans into gyral based regions of interest. *Neuroimage* 31, 968-980.
13. Chen, Y.J., Lo, Y.C., Hsu, Y.C., Fan, C.C., Hwang, T.J., Liu, C.M., et al., 2015. Automatic whole brain tract-based analysis using predefined tracts in a diffusion spectrum imaging template and an accurate registration strategy. *Hum. Brain Mapp*. 36, 3441–3458.
14. Hsu, Y.C., Tseng, W.Y., 2018. An efficient regularization method for diffusion MAP-MRI estimation. 2018 ISMRM-ESMRMB Joint Annual Meeting, Paris, France.

15. Ozarslan, E., Koay, C.G., Shepherd, T.M., Komlosh, M.E., Irfanoglu, M.O., Pierpaoli, C., et al., 2013. Mean apparent propagator (MAP) MRI: a novel diffusion imaging method for mapping tissue microstructure. *Neuroimage*. 78, 16–32.
16. Avram, A.V., Sarlls, J.E., Barnett, A.S., Ozarslan, E., Thomas, C., Irfanoglu, M.O., et al., 2016. Clinical feasibility of using mean apparent propagator (MAP) MRI to characterize brain tissue microstructure. *Neuroimage*. 127, 422–434.
17. Alexander, A.L., Lee, J.E., Lazar, M., Field, A.S., 2007. Diffusion Tensor Imaging of the Brain. *Neurotherapeutics*. 4, 316–329.
18. Le Bihan, D., Mangin, J.F., Poupon, C., Clark, C.A., Pappata, S., Molko, N., et al., 2001. Diffusion tensor imaging: concepts and applications. *J. Magn. Reson. Imaging*. 13, 534–546.
19. Tuch, D.S., 2004. Q-ball imaging. *Magn. Reson. Med*. 52, 1358–1372.
20. Hsu, Y.C., Lo, Y.C., Chen, Y.J., Wedeen, V.J., Isaac Tseng, W.Y., 2015. NTU-DSI-122: A diffusion spectrum imaging template with high anatomical matching to the ICBM-152 space. *Hum. Brain Mapp*. 36, 3528–3541.
21. Tzourio-Mazoyer, N., Landeau, B., Papathanassiou, D., Crivello, F., Etard, O., Delcroix, N., et al., 2002. Automated anatomical labeling of activations in SPM using a macroscopic anatomical parcellation of the MNI MRI single-subject brain. *Neuroimage*. 15, 273–289.
22. Ashburner, J., Friston, K.J., 2000. Voxel-based morphometry—the methods. *Neuroimage* 11, 805-821.

23. Hsu, Y.-C., Hsu, C.-H., Tseng, W.-Y.I., 2012. A large deformation diffeomorphic metric mapping solution for diffusion spectrum imaging datasets. *NeuroImage*. 63, 818–834.
